# Supplementary material
Source: publisher site journal article supplement (https://www.dovepress.com/get_supplementary_file.php?f=355225.xlsx)
Supplement: Supplementary file 1 [file get_supplementary_file.php]

## Sheet: Sheet1
Table S1 Primer sequences used for qRT-PCR.
Primer	5’-3’
BAG3-qPCR-F	TGAGAAGTTTAACCCCGTTGCTTGT
BAG3-qPCR-R	CCCCATCTACCCCTCCAGTCCAG
CTSD-qPCR-F	ATTCAGGGCGAGTACATGATCC
CTSD-qPCR-R	CGACACCTTGAGCGTGTAG
ERBB2-qPCR-F	TGTGACTGCCTGTCCCTACAA
ERBB2-qPCR-R	CCAGACCATAGCACACTCGG
MYC-qPCR-F	GTCAAGAGGCGAACACACAAC
MYC-qPCR-R	TTGGACGGACAGGATGTATGC
PEA15-qPCR-F	GGAGAGCCACAACAAGCTG
PEA15-qPCR-R	CCATAGTGAGTAGGTCAGGACG
RAB24-qPCR-F	TGACATTAGGTATTTGGGACACAG
RAB24-qPCR-R	TCACCCAGAACTTTGCTCG
SIRT1-qPCR-F	TAGCCTTGTCAGATAAGGAAGGA
SIRT1-qPCR-R	ACAGCTTCACAGTCAACTTTGT
GAPDH-qPCR-F	CATGAGAAGTATGACAACAGCCT
GAPDH-qPCR-R	AGTCCTTCCACGATACCAAAGT
Table S2 GO enrichment analysis of 28 DEARGs.
ONTOLOGY	ID	Description	P-value	P-adjust	geneID
Biological process	GO:0006914	autophagy	1.3669e-09	1.02996e-06	RHEB/SH3GLB1/HSPA8/BNIP3/BAG3/ATG9A/ATG16L2/RAB24/MAP1LC3A/SIRT1
Biological process	GO:0061919	process utilizing autophagic mechanism	1.3669e-09	1.02996e-06	RHEB/SH3GLB1/HSPA8/BNIP3/BAG3/ATG9A/ATG16L2/RAB24/MAP1LC3A/SIRT1
Biological process	GO:0016236	macroautophagy	8.34803e-09	4.19349e-06	RHEB/SH3GLB1/BNIP3/BAG3/ATG9A/ATG16L2/MAP1LC3A/SIRT1
Biological process	GO:0052548	regulation of endopeptidase activity	1.4074e-07	3.53492e-05	NLRC4/BIRC5/TNFSF10/SERPINA1/CTSD/MYC/CFLAR/SIRT1
Biological process	GO:0052547	regulation of peptidase activity	2.25316e-07	4.65212e-05	NLRC4/BIRC5/TNFSF10/SERPINA1/CTSD/MYC/CFLAR/SIRT1
Biological process	GO:0043281	regulation of cysteine-type endopeptidase activity involved in apoptotic process	2.34846e-08	8.84784e-06	NLRC4/BIRC5/TNFSF10/CTSD/MYC/CFLAR/SIRT1
Biological process	GO:2000116	regulation of cysteine-type endopeptidase activity	4.85852e-08	1.46436e-05	NLRC4/BIRC5/TNFSF10/CTSD/MYC/CFLAR/SIRT1
Biological process	GO:1903829	positive regulation of cellular protein localization	3.84615e-07	5.44012e-05	ITGA3/SH3GLB1/ITGB1/BAG3/PARP1/ERBB2/HSP90AB1
Biological process	GO:0000045	autophagosome assembly	2.46961e-07	4.65212e-05	SH3GLB1/BAG3/ATG9A/ATG16L2/MAP1LC3A
Biological process	GO:1905037	autophagosome organization	2.89558e-07	4.84849e-05	SH3GLB1/BAG3/ATG9A/ATG16L2/MAP1LC3A
Cellular component	GO:0005774	vacuolar membrane	7.31876e-08	4.85478e-06	RHEB/SH3GLB1/HSPA8/CTSD/SPNS1/ATG16L2/HSP90AB1/MAP1LC3A
Cellular component	GO:0005776	autophagosome	3.24006e-09	6.44771e-07	SH3GLB1/HSPA8/ATG9A/ATG16L2/RAB24/MAP1LC3A
Cellular component	GO:1904813	ficolin-1-rich granule lumen	1.8425e-08	1.83329e-06	HSPA8/SERPINA1/CTSB/CTSD/EEF2/HSP90AB1
Cellular component	GO:0101002	ficolin-1-rich granule	1.99629e-07	9.93154e-06	HSPA8/SERPINA1/CTSB/CTSD/EEF2/HSP90AB1
Cellular component	GO:0042470	melanosome	3.637e-07	1.20627e-05	HSPA8/CTSB/ITGB1/CTSD/HSP90AB1
Cellular component	GO:0048770	pigment granule	3.637e-07	1.20627e-05	HSPA8/CTSB/ITGB1/CTSD/HSP90AB1
Cellular component	GO:0034774	secretory granule lumen	8.00934e-05	0.00159386	HSPA8/SERPINA1/CTSD/EEF2/HSP90AB1
Cellular component	GO:0101031	chaperone complex	3.87891e-06	0.000110272	HSPA8/BAG3/HSP90AB1
Cellular component	GO:0000421	autophagosome membrane	1.77462e-05	0.000441436	SH3GLB1/ATG16L2/MAP1LC3A
Cellular component	GO:0071438	invadopodium membrane	2.90687e-05	0.000642741	ITGA3/ITGB1
Molecular function	GO:0050839	cell adhesion molecule binding	5.23041e-07	4.13203e-05	ITGA3/SH3GLB1/HSPA8/ITGB1/BAG3/EEF2/HSP90AB1/ATIC
Molecular function	GO:0045296	cadherin binding	4.83799e-07	4.13203e-05	SH3GLB1/HSPA8/ITGB1/BAG3/EEF2/HSP90AB1/ATIC
Molecular function	GO:0002020	protease binding	4.02787e-05	0.00212135	ITGA3/SERPINA1/ITGB1/CFLAR
Molecular function	GO:0005518	collagen binding	0.000142155	0.00561514	ITGA3/CTSB/ITGB1
Molecular function	GO:0051087	chaperone binding	0.000491713	0.0129484	BIRC5/HSPA8/BAG3
Molecular function	GO:0023026	MHC class II protein complex binding	0.000265471	0.00838888	HSPA8/HSP90AB1
Molecular function	GO:0023023	MHC protein complex binding	0.00065808	0.0148538	HSPA8/HSP90AB1
Molecular function	GO:0001968	fibronectin binding	0.000768507	0.015178	ITGA3/ITGB1
Molecular function	GO:0043236	laminin binding	0.000887257	0.0155763	ITGA3/ITGB1
Molecular function	GO:0032813	tumor necrosis factor receptor superfamily binding	0.002226	0.0263085	TNFSF10/CFLAR
Table S3 KEGG pathway enrichment analysis of 40 differentially expressed autophagy-related genes.
ID	Description	P-value	P-adjust	qvalue	geneID
hsa04140	Autophagy - animal	7.44116e-11	8.9294e-09	6.58e-09	CTSB/CTSD/CFLAR/BNIP3/ATG9A/ATG16L2/RHEB/SH3GLB1/MAP1LC3A
hsa04210	Apoptosis	1.58655e-06	9.51932e-05	7.01424e-05	CTSB/CFLAR/CTSD/TNFSF10/BIRC5/PARP1
hsa04151	PI3K-Akt signaling pathway	0.000354961	0.0141985	0.010462	ERBB2/MYC/ ITGB1/ RHEB/ ITGA3/ HSP90AB1
hsa05134	Legionellosis	0.000527078	0.0158123	0.0116512	NLRC4/HSPA8/BNIP3
hsa04217	Necroptosis	0.000940484	0.0208991	0.0153994	CFLAR/PARP1/HSP90AB1/TNFSF10
hsa04137	Mitophagy - animal	0.00104496	0.0208991	0.0153994	ATG9A/BNIP3/MAP1LC3A
hsa04612	Antigen processing and presentation	0.00131824	0.0225984	0.0166514	HSPA8/HSP90AB1/CTSB
hsa04621	NOD-like receptor signaling pathway	0.00161753	0.024263	0.017878	NLRC4/CTSB/MAP1LC3A/HSP90AB1
hsa05222	Small cell lung cancer	0.0021205	0.0282733	0.0208329	ITGB1/MYC/ITGA3
hsa04152	AMPK signaling pathway	0.00450332	0.048411	0.0356712	EEF2/RHEB/SIRT1
hsa05131	Shigellosis	0.00470419	0.048411	0.0356712	BNIP3/ITGB1/NLRC4/MAP1LC3A
hsa05132	Salmonella infection	0.0048411	0.048411	0.0356712	MYC/HSP90AB1/TNFSF10/NLRC4
